25 **AND**

26

27 Dayanjan Wijesinghe PhD

28 PO Box 980533, Robert Blackwell Smith Bldg. Rm. 652A

29 410 North 12th Street

30 Richmond, VA 23298-5048

31 USA.

32 [wijesingheds@vcu.edu](mailto:wijesingheds@vcu.edu)

33

34 **Author Contributions**

35 G.G. participated in study design, collecting the data, and writing and revising the manuscript.

36 J.S. participated in analyzing data, writing and revising the manuscript.

37 S.B. and N.G.K. participated in the generation of data.

38 P.K, A.K, M.L. and D.K participated in editing the manuscript.

39 D.C. participated in the generation and analysis of data and writing and revising the manuscript.

40 D.S.W. participated in study design, collecting the data, analyzing the data, writing, and revising  
41 the manuscript

42

43

44 **ABSTRACT**

45 There is a lack of biomarkers for pre-kidney transplant immune risk stratification to avoid over-  
46 or under-immunosuppression. Since the circulating lipidome is integrally involved in  
47 inflammation, we hypothesized that the lipidome may provide biomarkers that are helpful in the  
48 prediction of antibody-mediated rejection. We used mass spectrometry to detect the plasma  
49 lipidome in samples collected over 1 year post-kidney transplant from a prospective,  
50 observational cohort of adult kidney transplant recipients (KTR), classified in two groups, one  
51 with antibody mediated rejection (AMR) and the other with stable graft function (SC). We used  
52 linear discriminant analysis to generate predictive models of rejection. A ‘lipid-only’ model  
53 generated from samples taken on day of transplant (T1) revealed a seven lipid classifier  
54 (lysophosphatidylethanolamine and phosphatidylcholine species) with misclassification rate of  
55 8.9% [AUC = 0.95 (95% CI = 0.84-0.98),  $R^2 = 0.63$ ]. A clinical model [(using donor specific  
56 antibody (DSA) and panel reactive antibody (PRA)] was inferior with a misclassification rate of  
57 15.6% [AUC = 0.82 (95% CI = 0.69-0.93),  $R^2 = 0.41$ ]. A combined model using four lipid  
58 classifiers and DSA improved the AUC further to 0.98 (95% CI = 0.89-1.0,  $R^2 = 0.83$ ) with a  
59 misclassification of only 2.2%. The polyunsaturated phospholipid subspecies that discriminated  
60 the two groups were much lower in the AMR group when compared to the SC group. While the  
61 lipidomic profile changed significantly among SC patients on serial sampling post-transplant,  
62 such changes were not seen in AMR patients. After taking serial lipidomic changes overtime in  
63 SC patients in to account, the AMR group still showed sustained decreased levels of specific  
64 lipids at the time of AMR. These findings suggest that a lack of anti-inflammatory  
65 polyunsaturated phospholipids could identify patients at a higher risk of AMR at the time of  
66 transplant.

67

## 68 INTRODUCTION

69 The complex biochemistry of human biological systems has been operationally separated  
70 into a set of large molecular categories. The metabolome, as it is termed, includes four classes of  
71 biologically active molecules that consist of proteins and amino acids, carbohydrates and sugars,  
72 nucleic acids (both DNA and RNA), and lipids. The full lipid profile that encompasses the  
73 complete set of lipid molecules in a human is termed the lipidome. The general term lipid  
74 describes a very large, ubiquitous and diverse class of molecules that have a structural and  
75 functional role in biological systems. Lipids are an integral structural component of cell  
76 membranes, play a significant role in energy storage, are involved in a variety of signaling  
77 pathways and intersect in the complex biochemistry of the other classes of compounds in the  
78 metabolome(1). Furthermore, by altering the properties of cellular membranes, the lipidome also  
79 has the ability to influence membrane mediated events such as enzyme association with  
80 membranes required for some catalytic events. Since first characterized in 2002, alterations of  
81 the lipidome have been intensely studied in a variety of conditions(2). Distinct lipid profiles have  
82 been identified in the normal state and in a variety of pathologic conditions and in response to  
83 specific therapeutic interventions(3–7).

84 Renal allograft transplantation is the treatment of choice for End Stage Renal Disease  
85 (ESRD). In the United States, a shortage of suitable organ donors and resultant organs available  
86 for transplant, creates a marked supply and demand discrepancy leaving many patients on the  
87 waiting list for prolonged periods of time(8). If evidence based risk stratification could occur  
88 pre-transplant then more effective and tailored immunosuppressive strategies could be designed  
89 to minimize the risk of rejection and infection post-transplant. Current immunosuppression  
90 protocols have resulted in a marked decrease in T-cell mediated rejection, at the cost of long  
91 term immunosuppression with its resultant adverse effects including susceptibility to

92 opportunistic infections, graft damage, and metabolic complications such as hypertension,  
93 diabetes, and lipid abnormalities which predispose to cardiovascular disease(9,10). However,  
94 current immunosuppression protocols are not as effective in suppressing antibody mediated  
95 rejection (AMR), which is a major cause of graft loss(10).

96 At the present time standardized immunosuppression protocols rather than individualized  
97 immunosuppression is the routine practice for kidney transplantation, because suitable pre-  
98 transplant risk stratification biomarkers that can predict future transplant rejection are not  
99 available for clinical practice. It was previously thought that donor specific antibodies and the  
100 degree of sensitization might serve as stratification tools, but they have been shown to be  
101 inadequate predictors of future rejection (11). Thus, there is an unmet need for biomarkers that  
102 could allow for better initial risk stratification while enhancing the benefits/risks of  
103 immunosuppression therapy for individual patients.

104

## 105 **MATERIALS AND METHODS:**

### 106 **Patient Selection**

107 The Virginia Commonwealth University Institutional Review Board (IRB) approved this  
108 study. Patients were selected from a prospective observational cohort of a single-institution adult  
109 kidney transplant center in the United States. The study population consisted of 16 consecutive  
110 patients who developed antibody-mediated rejection within 2 years of kidney transplant and 29  
111 stable control (SC) patients who did not develop rejection at any point of post-transplant follow-  
112 up. Serial plasma samples were collected and stored at Time 1 (T1 - pre-transplant), Month 6  
113 (T2) and Month 12 (T3) and then yearly for all patient's post-transplant as part of an IRB  
114 approved biobank protocol at our institution. For the AMR group, serum samples were drawn at  
115 the time of transplant (T1), at rejection (T2) and at the end of successful therapy (T3).

116           The SC patients were selected based on the retrospective observation during the period of  
117 the study for stable renal function, with no episodes of rejection, with known adherence to the  
118 immunosuppressive regimen, and with a sufficient volume of samples at the appropriate time  
119 points for lipid research assays. A minimum follow-up of 2 years was mandated to be a  
120 candidate for inclusion in the study. Pediatric kidney recipients and multi-organ transplant  
121 recipients were excluded.

122           At our institution all patients received a standardized immunosuppression induction  
123 protocol using anti-thymocyte globulin (Thymoglobulin, Genzyme, Cambridge, MA) with a  
124 total of 6 mg/kg over four consecutive days beginning in the operating room. Maintenance  
125 immunosuppression included a combination of tacrolimus, mycophenolate mofetil and  
126 prednisone tapered to 5 mg/day. Highly sensitized patients received 6 sessions of pre-emptive  
127 plasmapheresis with intravenous immunoglobulin (IVIG; 100mg/kg) based upon a pre-specified  
128 protocol as reported by us previously (12).

129           Indication biopsies were performed for acute allograft dysfunction defined as a rise in  
130 creatinine >20% above baseline, serum creatinine nadir  $\geq 2.0$  mg/dL post-transplant; or delayed  
131 graft function >21 days post-transplant. Surveillance biopsies were performed in patients with a  
132 positive flow-cytometric crossmatch (T or B >100 mean channel shifts) and/or presence of pre-  
133 formed donor-specific antibody [DSA; >5000 mean fluorescence intensity (MFI)] at 1 month and  
134 6-months post-transplant. Biopsies were graded based upon the Banff criteria (13). Patients with  
135 AMR were treated with 6-9 sessions of plasmapheresis with intravenous immunoglobulin (IVIG;  
136 100 mg/kg) in conjunction with intravenous methylprednisolone 500 mg administered once daily  
137 for 3 days. In selected cases, additional drug therapy with rituximab or bortezomib was instituted  
138 based upon clinical response.

139           The details of antibody testing performed at our center have been described previously  
140 (14). Briefly, pre-transplant complement-dependent cytotoxicity (CDC) assays and three-color  
141 flow-cytometric cross matching (FCXM) were performed for all patients at the time of  
142 transplant. Donor-specific antibodies (DSA) were analyzed using the Luminex platform  
143 (Immucor Platform, San Diego, CA) with the use of an HLA phenotype panel (Lifematch Class I  
144 and Class II ID, Gen-Probe) and a single-antigen panel (Single Antigen Beads, Immucor  
145 Platform). Results of bead assays were measured as MFI. For highly sensitized patients an MFI  
146 of >5,000 and for de-novo kidney transplant recipients an MFI >10,000 was considered  
147 unacceptable for routine transplantation. Calculated Panel Reactive Antibody (cPRA) was  
148 determined using the OPTN calculator from the following url:

149 <https://optn.transplant.hrsa.gov/resources/allocation-calculators/cpra-calculator/>

150

### 151 **Lipidomic Analysis**

152 Serial serum samples were stored at -80°C prior to research use. Upon initiation of experiments,  
153 samples were prepared for analysis using an HILIC-based UPLC ESI-MS/MS method. 50 µL of  
154 plasma was added to 750 µL of MTBE (methyl-tertiary butyl ether), containing 20 µL of  
155 SPLASH internal standards (SPLASH LIPIDOMIX Mass Spec Standard – Avanti 330707), and  
156 160 µL of water. After centrifugation for 2 minutes at 12,300 rpm, 350 µL of supernatant was  
157 transferred to auto sampler vials and dried under vacuum. Dried extracts were re-suspended  
158 using 110 µL of a methanol:toluene (10:1, v/v) mixture containing CUDA (12-  
159 [[(cyclohexylamino) carbonyl] amino]-dodecanoic acid) at a final concentration of 50 ng/ml.

160           Samples were analyzed on a QTRAP 6500+, with Shimadzu Nexera UPLC. Analytes  
161 were separated on a Waters BEH HILIC 1.7 µm 2.1x150 mm column (column temperature =  
162 30°C). Mobile phase A: 10 mM ammonium acetate (pH 8) in 95% ACN (acetonitrile). Mobile



163 phase B: 10 mM ammonium acetate (pH 8) in 50% ACN. Gradient (B%) ramps from 0.1 to 20 in  
164 10 mins; rises to 98 at 11 min, keeps for 2 mins, then drops back to 0.1 and maintains for 3 mins.

165

## 166 **Statistical Analysis**

167 A comparison t-test analysis (FDR=0.05) was used to select group differences on the day  
168 of transplant. Mean values for each lipids class were obtained by sum and average. Linear  
169 Discriminant Analysis with regularized correction (RLDA) models for lipids and clinical  
170 parameters were created with a stepwise forward method (Fig. 1). Regression performance was  
171 estimated with  $R^2$ , misclassification error and area under the ROC Curve (AUC). Estimates were  
172 validated with bootstrap coefficient interval (Fig. 1). Predictors combined model was cross  
173 validated with Random Forest method, and the misclassification out-of-bag error (OOB error)  
174 was estimated and compared to the RLDA error for validation (Fig. 1). Changes over time were  
175 also estimated using the sparse partial least square method and separation of the groups was  
176 validated with a permutation test. A t-test was used to compare two time points within a group  
177 and for comparing different groups at matched time points. Data was analyzed with JMP Pro 13  
178 and MetaboAnalyst 3.0. The statistical workflow is depicted in Fig. 1.

179

## 180 **RESULTS:**

181 Demographic comparison of the two groups prior to transplantation is shown in Table 1.  
182 Patients in the AMR group were more likely to be female, re-transplants and had a higher degree  
183 of sensitization (higher cPRA) and presence of donor specific antibody (higher DSA) at the time  
184 of transplant. They were also more likely to have hyperlipidemia. There were no differences  
185 noted for age, race, weight, years on dialysis, type of dialysis, delayed graft function, or the  
186 presence or absence of diabetes mellitus.

187 A comparison of phospholipid (PL) classes at T1 revealed relative concentration  
188 differences between SC and AMR (Fig. 2). The concentration of phosphatidylcholine (PC) was  
189 significantly diminished in AMR, while there was a trend for an increased concentration of  
190 lysophosphatidylcholine (LPC). The AMR group also showed a significantly lower  
191 concentration of phosphatidylethanolamine (PE), lysophosphatidylethanolamine (LPE),  
192 plasmalyethanolamine (PE-O), and plasmenylethanolamine (PE-P). Although not statistically  
193 significant, there was also lower concentration of Phosphoglycerol (PG),  
194 lysophosphatidylglycerol (LPG), and sphingomyelin (SM). The activity of phospholipase A<sub>2</sub>  
195 (PLA<sub>2</sub>) as a signal of increased metabolism was assessed by the ratio of PL to lysophospholipids  
196 (LPL). The AMR group showed decreased ratios of PC/LPC and PE/LPE indicating higher  
197 activity of PLA<sub>2</sub> at T1. PL degradation, evident for PE, was higher in the AMR group compared  
198 to the SC group. .

199

## 200 **Combined lipid and clinical parameters allow for the prediction of rejection on the day of** 201 **transplant (T1).**

202 Preliminary data demonstrated that there are significant differences in the pre-transplant  
203 lipidome between SC and AMR. This led to the hypothesis that the T1 lipidome or some  
204 combination of the lipidome and clinical parameters could provide insight into the risk of future  
205 transplant rejection, enabling better risk stratification for kidney transplant recipients. To  
206 investigate this possibility, a stepwise regularized linear regression was deployed using models  
207 of lipids alone, clinical data alone, and a merged lipid and clinical data to test for prediction  
208 accuracy (Table 2). The analysis identified seven distinct lipids that discriminated between AMR  
209 and SC with 8.9% of the events misclassified [Area under receiver operating characteristic curve  
210 (AUC) =0.95 (95%CI=0.84-0.98), R<sup>2</sup>=0.63 (95%CI=0.4-0.8)]. A clinical model using cPRA and

211 DSA was inferior with 15.6% of the events misclassified, AUC=0.80 (95%CI=0.66-0.90),  
212 R<sup>2</sup>=0.36 (95%CI=0.16-0.57). Still using a stepwise selection approach, a combined model  
213 determined with 4 lipids plus DSA further reduced the misclassification events to 2.2% (Fig. 3),  
214 and the AUC improved to 0.97 (95% CI=0.88-1.0), R<sup>2</sup>=0.81 (95%CI=0.49-0.96).

215 Further comparison of the four lipids predictors of kidney rejection showed that these  
216 lipids are significantly decreased in AMR compared to the SC group. In the PC (18:0 /20:4) plot,  
217 it is possible to notice the presence of outliers in both groups (Fig. 4A). Random Forest method  
218 was used for statistical validation with 500 bootstrap samples, and the mean decrease accuracy  
219 test was used estimate the importance of each predictor to the validation model (Fig. 4B). The  
220 result revealed that DSA is the more important clinical biomarker of AMR at T1, and together  
221 with LPE (16:0) and PC (18:0/20:4) can discriminate AMR with a very low error (2.2%). The  
222 statistical validation also revealed that exclusion of LPE (22:6) and LPE (20:4) in the model  
223 would have a minimal effect on the misclassification error. Although in the RLDA modeling  
224 training, using the entire study population, the addition of these two lipids takes the model  
225 estimation from R<sup>2</sup>=0.75 to R<sup>2</sup>=0.81.

226

227 **Serial analyses of the lipidome over the course of one year identify time dependent lipid**  
228 **changes among patients with a favorable transplant outcome, but no differences among**  
229 **graft recipients with non-favorable outcomes.**

230 Following the identification of the lipid differences at T1 and their ability to predict graft  
231 rejection in association with measured clinical parameters, we wished to investigate how the  
232 lipidome changes over time in patients with a favorable transplant outcome (SC). To achieve this  
233 end, serial lipid profiles were analyzed from samples collected at Day 0, 6 months and 12 months  
234 post-transplant (Fig. 5). A sPLSDA analysis of the data revealed a statistically significant

235 alteration in the metabolic profile at 6 months post-transplant compared to the day of transplant  
236 (Fig. 5A). However, for the subsequent times from 6 months to 12 months, there was no  
237 significant change in the lipidomic profile. This finding suggests that stabilization of the lipid  
238 changes after transplant is associated with the achievement of improved kidney function and  
239 possibly a reduced milieu of inflammation (Fig. 5B). The data was subjected to validation using  
240 the permutation test (Fig. 5C) and showed a statistically significant metabolic difference ( $p=$   
241 0.034) from T1 to 6 months after transplantation.

242 Further investigation of the lipid differences between T1 and T2 identified 19 lipids that  
243 represent the relevant time dependent alterations in the lipidome that had statistically significant  
244 elevations at T2 compared to T1 in the SC group. (Fig. 6). A majority of these lipids changes  
245 are LPC, with a few PC, one PE-O, two PE-P, and one PG.

246 Following the identification of the longitudinal lipid trajectory among patients with  
247 favorable transplant outcomes, we investigated the trajectory of the lipidome pre-transplant to  
248 post transplant one year, among the patients with non-favorable outcomes (AMR) (Fig. 7).  
249 sPLSDA analysis of the data reveal that there was no significant alteration in the lipid profile at  
250 pre-rejection and post-rejection compared to T1 (Fig. 7a). While a slight change was observed  
251 from T1 to post-rejection (Fig. 7B), validation analysis using permutation testing demonstrated  
252 this difference to be non-significant ( $p=0.869$ ) (Fig. 7C). These findings indicate that in contrast  
253 to patients with a favorable transplant outcome (SC), patients with non-favorable transplant  
254 outcomes (AMR) demonstrated no change in the lipid profile observed pre-transplant over time.

255

256 **Significant post-transplant lipid differences were observed between Stable Controls vs.**  
257 **those with Antibody-mediated Rejection**

258           As our data revealed that there were significant T1 vs T2 lipid differences between SC,  
259 but not in AMR, we further investigated the data to identify the exact differences in the lipidome  
260 between SC and AMR at T2. Any differences identified would indicate an alteration in the lipid  
261 metabolic environment at the time of rejection that would distinguish AMR from SC. Since there  
262 were no significant differences between T2 and T3 for SC group we chose to use SC at T2 (6  
263 months post-transplant) to compare with AMT at T2 (time of AMR). The analysis revealed a  
264 panel of 13 lipids that were found to differentiate the two groups at T2 (Fig. 8). As noted  
265 previously, these 13 lipids were again comprised of LPE and PC species containing  
266 monounsaturated and polyunsaturated fatty acids, except for LPE (16:0). This data further  
267 confirms the presence of a sustained lipid metabolic difference between SC and AMR over time  
268 that distinguish these two groups of patients.

269

270

271 **DISCUSSION:**

272 In this first study, we report novel data that the lipidome could be used to identify kidney  
273 transplant patients with a higher risk of antibody-mediated rejection at the time of transplant. In  
274 addition, for the first time we demonstrate that combining lipidomic and clinical data to create a  
275 model merging the presence of donor-specific antibody and lipids (a reduction of each of the  
276 four identified lipid biomarkers, one PC and three LPE species) can discriminate AMR with  
277 minimal error even at the time of transplant. Statistical validation suggests that DSA, LPE (16:0)  
278 and PC (18:0/20:4) are putative biomarkers that should be further tested in a prospective clinical  
279 study. These biomarkers could indicate a state of increased inflammation associated with chronic  
280 kidney disease and hemodialysis in selected groups of patients compared with others(15).

281 Modulation of phospholipids (PL) in chronic kidney disease (CKD) is well described in  
282 the literature. In a study of CKD among rats, Zhao *et al.* identified that PC, PE, LPC, LPE and  
283 triacylglycerides (TG) steadily decreased as the pathology progressed over time (16). Braun  
284 *et al* described that the aged kidney from adult wild-type mice expresses significant decreases  
285 of PC, PE, PG, SM, phosphatidylserine (PS), and Ceramides, suggesting that change in PL  
286 metabolism is associated with CKD (3). Kobayashi *et al.* reported an elevation of LPE 20:4 in  
287 the plasma of adenine-induced CKD rats when comparing with control animals(17). In a human  
288 study comparing healthy controls and CKD patients, Reis *et al.* found that the content of total  
289 PC and Ceramides were decreased along with the ratio of LPC/LPE(18). In a study comparing  
290 patients with CKD progression compared to control patients, Afshinnia *et al.* reported that  
291 CKD progression was associated with lower Cholesteryl ester (CE), diacylglycerols (DG),  
292 PC, plasmenylcholine (PC-P), PE-P, and phosphatidic acid (PA), and elevated PE and  
293 monoacylglycerols (MAG)(19). This finding suggests that patients with CKD progression  
294 with a decrease of longer acyl chains and polyunsaturated lipids might benefit from the effects

295 of polyunsaturated fatty acid supplementation, as some previous studies have  
296 suggested(20,21). In our study, although both groups represent patients who had CKD  
297 progression, the SC group had higher PC and LPE than the AMR group and a trend for lower  
298 LPC suggesting that subpopulations with varying degrees of inflammatory milieu might exist  
299 with the CKD population. This would be consistent with the real-life observation of patients who  
300 have varying degrees of risk of rejection.

301 LPC has being associated with pro-inflammatory effects(22), but there is not much  
302 information about the effects of LPE. Some studies suggest that LPE could have a possible  
303 protective effect over inflammation. Schober *et al.* demonstrated that LPE generation from PE  
304 oxidation is primarily due to PLA<sub>2</sub> activity rather than by hypochlorous acid generated by  
305 myeloperoxidase, while LPC can be generated from both processes(23). The dual effect of PLA<sub>2</sub>  
306 is well known by its pro-inflammatory action in hydrolysis of PC to produce LPC promoting  
307 atherogenesis, as well as its anti-inflammatory action in hydrolysis of platelet-activating factor  
308 (PAF) and oxidized PLs(24). This suggest that processes that are not directly related to oxidative  
309 stress generate LPE in CKD patients. The activity of PLA<sub>2</sub> in our study was assessed by the ratio  
310 of PL to LPL. The AMR group had a higher PLA<sub>2</sub> activity, especially for degradation of PE to  
311 produce LPE. The PC/LPC ratio, as an inflammatory marker is also indirectly represented by the  
312 increased activity of PLA<sub>2</sub> in inflammatory diseases(25,26).

313 It has been reported that *in vitro* LPE induces activation of the mitogen-activated protein  
314 kinase (MAPK) cascade, an intracellular signal transduction pathway that controls growth,  
315 proliferation, differentiation, motility, stress response, and has a survival along with ananti-  
316 apoptotic effects(27). Also LPE increases intracellular Ca<sup>2+</sup> through a Lysophosphatidic acid  
317 (LPA) G-protein-coupled receptor (GPCR)(28). Oral administration of LPE in rats with zymosan  
318 A-induced peritonitis demonstrated a vast anti-inflammatory action. In that study LPE-

319 containing polyunsaturated fatty acids administration inhibited plasma leakage by diminishing  
320 the formation of LTC<sub>4</sub>, inhibited the leukocyte extravasation into the peritoneum, decreased  
321 formation of potent chemotactic factors such as LTB<sub>4</sub> and 12-HETE, lowered IL-1 $\beta$ , IL-6, TNF-  
322  $\alpha$ , and augmented IL-10(29).

323 Our results suggest that the lack of anti-inflammatory protection in patients on the day of  
324 transplant is a risk for future rejection. No relevant changes occurred for the AMR group until  
325 the onset of rejection, confirming that the metabolic profile at T1 predicting AMR persisted after  
326 transplantation. Accordingly, over time comparison of SC and AMR showed that the difference  
327 in LPE and PC levels were sustained after 6 months representing the metabolic difference  
328 between rejection and non-rejection. The presence of monounsaturated and polyunsaturated fatty  
329 acids in PL is also an indication that their low plasma content is a risk factor for kidney health  
330 (30). In contrast, the elevation of LPC, PC, PE-O, PE-P, and PG after 6 months in SC group  
331 imply that restoration of PL content is the result of successful transplantation. Indeed, some  
332 studies have shown that elevation of polyunsaturated fatty acids present a lower risk of  
333 developing end-stage renal disease (31), as well as higher survival rates after kidney  
334 transplantation(32).

335 There are some limitations to our study. Demographic comparisons between the SC and  
336 AMR groups at T1 revealed that female gender, re-transplant, cPRA, DSA, and hyperlipidemia  
337 were statistically more likely to be present in the AMR group. Moreover, we found DSA as the  
338 strongest predictor of AMR. These findings are consistent with Dunn *et al.* who reported that  
339 DSA and female gender were risk factors for AMR (33). Thus, the two groups could have been  
340 inherently different biochemically. Future larger studies with an increased sample size would be  
341 need to confirm this preliminary study. Our finding of hyperlipidemia in AMR group could be  
342 linked to the fact that hyperlipidemia is the most common form of dyslipidemia, a common



343 complication in CKD patients, associated with the decline in kidney function,  
344 hypertriglyceridemia, low HDL, and low or normal LDL (34).

345

## 346 **CONCLUSION:**

347 Our study for the first time identifies the pre-transplant, post-transplant, and pre-rejection  
348 lipid differences that distinguish kidney transplant patients with favorable transplant outcomes  
349 (SC) and a major cause of non-favorable transplant outcomes (AMR). We further demonstrate  
350 that unlike SC patients that demonstrate a dynamic longitudinal lipid change, AMR patients  
351 maintain a relatively unchanging lipid profile over time with respect to the measured lipids. In  
352 addition, we demonstrate for the first time the feasibility of risk stratification of kidney  
353 transplant patients on the day of transplant about the possibility of prediction for future AMR.  
354 Following prospective validation in a larger cohort, these findings have the potential to alter the  
355 current paradigm of pre- and post-transplant monitoring. Treatment of these patients with an  
356 evidenced based risk stratification strategy could vastly improve the success of kidney  
357 transplantation.

358

## 359 **DISCLOSURE**

360 There are no conflicts of interest to report for any of the authors.

361

## 362 **ACKNOWLEDGEMENT**

363 Research reported in this publication was supported by research grants from National Institutes of  
364 Health under grant numbers HD087198 (to DSW). The content is solely the responsibility of the authors  
365 and does not necessarily represent the official views of the National Institutes of Health. This work also  
366 received support via a Young Investigator Award from SCIEX for clinical lipidomic research (DSW).



368 **FIGURE LEGENDS, TABLES AND FIGURES**

369

370 **Fig. 1: Statistical analysis workflow for the study.** After data filtering and normalization, a  
371 statistical workflow based on Regularized Linear Discriminant Analysis (RLDA) and Sparse  
372 Partial Least Square Discriminant Analysis (sPLSDA) was applied. Candidate variables were  
373 selected by t-test with a False Discover Rate (FDR) =0.05. RLDA at T1 identified lipid  
374 biomarkers that predicted AMR. Predictive models using lipids, clinical parameters, and the  
375 combination of both markers were analyzed using a forward stepwise regression. . Bootstrap and  
376 Random Forest were used as internal validation. sPLSDA at three different time points was used  
377 to identify and compare metabolic changes indicative of AMR. A permutation test was then used  
378 for validation.

379

380 **Fig. 2: Significant differences are observed among phospholipids at T1 between SC and**  
381 **AMR.** A) The AMR group showed a significantly lower concentration of PC, PE, and LPE  
382 (phospholipids). There was a trend towards higher levels of LPC (lipophospholipids) in AMR. B)  
383 PLA<sub>2</sub> activity, an indicator of phospholipid degradation to produce LPL was assessed by the  
384 ratio of PL to LPL. A lower value suggests higher activity as shown by PC/LPC and PE/LPE  
385 ratios in AMR. Suspected outliers are indicated by open circles in the box plots. Green rectangles  
386 represent AMR and the red rectangles represent SC. \* indicates significant differences with  
387 p<0.05.

388

389 **Fig. 3: The RLDA model generated using four lipids and DSA demonstrate good**  
390 **separation between AMR and SC groups.** The RLDA plot shows the clear separation of the  
391 patients in the two groups based on the Mahalanobis distance. This method determines whether

392 the selected predictors can separate the distinct categories and reveals the presence of outliers in  
393 the AMR and SC groups. Blue dots among the red dots indicates the one misclassified patient  
394 identified in the predictive model. Internal ellipse indicates the 95% confidence region  
395 containing the true mean of the group. External ellipse indicates the region estimated to contain  
396 50% of group' population.

397

398 **Fig. 4: Predictors of AMR on the day of transplant and Random Forest statistical**  
399 **validation.** A) Box plot of normalized concentrations shows that the AMR group has lower  
400 concentrations of the lipids predictors. Suspected outliers are represented as open circles that  
401 appear outside the whiskers. The validation method showed that the prediction model could  
402 discriminate SC and AMR at T1 with 0.022 OOB error. The mean Decrease Accuracy method  
403 shows that DSA is the more important predictor, followed by LPE (16:0) and PC (18:0/20:4) and  
404 they independently could be used as biomarkers. The analysis also reveals that when considering  
405 these predictors as biomarkers, the inclusion of LPE (20:4) and LPE (22:6) does not add any  
406 predictive power, and rather must be used to compose the RLDA model. \* indicates significant  
407 differences with  $p < 0.01$ .

408

409 **Fig. 5: The lipidome of SC demonstrate clear differences between T1 and T2 but no**  
410 **differences between T2 and T3.** A) The graphical distribution of T1 (shown in red), T2 (shown  
411 in green), and T3 (shown in blue) indicates that there is no difference between 6 months and 1-  
412 year post-transplant, after a metabolic shift from T1 to T2. B) The lipid difference is highlighted  
413 by the change in the first 6 months. C) Permutation test was performed as a validation test to  
414 evaluate the statistical significance of the PLS-DA model separation from T1 to T2 ( $p = 0.034$ ).  
415 Ellipses represent the 95%CI for each time point.

416

417 **Fig. 6: Specific lipids characterize the difference between T1 and T2 among SC patients.**

418 The levels of the 19 different lipids that are significantly elevated 6 months after transplantation  
419 are mostly comprised from the LPC class containing both unsaturated and saturated fatty acids.  
420 PCs, PE-O, PE-P and PG are also elevated after 6 months. \* indicates significant differences  
421 with  $p < 0.01$ .

422

423 **Fig. 7: Contrary to SC patients, no statistically significant difference was observed in the**

424 **T1 and T2 lipidome of AMR patients.** A) The graphical distribution of T1 (shown in red), T2  
425 (shown in green), and T3 (shown in blue) indicates that there is no difference over time, although  
426 a slight metabolic shift could be detected from T1 to post-rejection. B) The plot of the slight  
427 metabolic difference from T1 to T2 highlights the overlap of the 95% CI of the two time points.  
428 C) Permutation test was performed as a validation test and shows that this difference in the PLS-  
429 DA model separation from T1 to T2 is not statistically significant ( $p = 0.869$ ). Ellipses represent  
430 the 95% CI of each time point.

431 **Fig. 8: Specific lipids demonstrate significant differences between SC and AMR at T2.** The

432 metabolic changes observed at T1 were sustained 6 months after transplant with lower LPE and  
433 PC species in AMR group. Except for LPE (16:0) all lipids contained monounsaturated and  
434 polyunsaturated fatty acids. SC group shown in red. AMR group shown in green. \* indicates  
435 significant differences with  $p < 0.01$ .

436

437

438

439

440

441 **Table 1 – Demographic Characteristics of the Patient Cohort** - Categorical variables were  
 442 analyzed with the Fisher’s exact test; Continuous data is presented as a mean of the group ±  
 443 standard deviation and is analyzed by t-test. SD: Standard deviation; cPRA: calculated panel  
 444 reactive antibody; DSA: donor specific antibody; GRF: glomerular filtration rate.

| Characteristic                            | SC          | AMR         | p-value |
|-------------------------------------------|-------------|-------------|---------|
| <b>N</b>                                  | 29 (100%)   | 16 (100%)   |         |
| <b>Female Gender</b>                      | 4 (14%)     | 11 (69%)    | 0.005*  |
| <b>Age, years (Mean±SD)</b>               | 47±11       | 50±9        | 0.45    |
| <b>African-American Race</b>              | 17 (59%)    | 13 (81%)    | 0.19    |
| <b>Pre-transplant Diabetes</b>            | 10 (34%)    | 8 (50%)     | 0.35    |
| <b>Pre-transplant hyperlipidemia</b>      | 7 (29%)     | 16 (100%)   | 0.04*   |
| <b>Weight at Transplant, kg (Mean±SD)</b> | 85±21       | 82±14       | 0.6     |
| <b>Years on dialysis (Mean±SD)</b>        | 2.9±1.9     | 4.3±4.1     | 0.26    |
| <b>Mode of dialysis</b>                   |             |             |         |
| <b>Hemodialysis</b>                       | 19 (65%)    | 13 (81%)    | 0.49    |
| <b>Peritoneal Dialysis</b>                | 4 (14%)     | 2 (12%)     |         |
| <b>Preemptive transplant</b>              | 6 (21%)     | 1 (7%)      |         |
| <b>Re-transplant</b>                      | 4 (14%)     | 9 (56%)     | 0.001*  |
| <b>cPRA, % (Mean±SD)</b>                  | 9.8 (±29.4) | 40.8(±45.8) | 0.023*  |
| <b>DSA</b>                                | 1 (3%)      | 8 (50%)     | <0.001* |
| <b>Kidney Donor Profile Index, %</b>      | 52±27       | 54 ±32      | 0.89    |
| <b>Delayed Graft Function</b>             | 13 (45%)    | 7 (44%)     | 1.00    |
| <b>GFR at 6 months post-transplant*</b>   | 67±22       | 61±23       | 0.37    |
| <b>GFR at 12 months post-transplant*</b>  | 68±19       | 58±22       | 0.11    |

445  
 446  
 447

448 **Table 2 – Predictors of Rejection at the Time of Transplant - Bootstrap validation with 95%**  
 449 Confidence intervals is included for RLDA estimates and area under the curve (AUC). cPRA:  
 450 Calculated Panel Reactive Antibody; DSA: donor specific antibodies; GFR: Estimated  
 451 glomerular filtration rate (mL/min/1.73m<sup>2</sup>); SC: Stable Controls; AMR: Antibody-mediated  
 452 Rejection; \*statistically significant.

| Model                | Predictors     | R <sup>2</sup>        | Misclassification    | AUC                   |
|----------------------|----------------|-----------------------|----------------------|-----------------------|
| <b>Only lipids</b>   | PC (16:0/22:6) | 0.63<br>(0.40 – 0.80) | 8.9%<br>(3.3 – 18.6) | 0.95<br>(0.84 – 0.98) |
|                      | PC (18:0/20:4) |                       |                      |                       |
|                      | PC (18:1/20:4) |                       |                      |                       |
|                      | LPE (16:0)     |                       |                      |                       |
|                      | LPE (16:1)     |                       |                      |                       |
|                      | LPE (20:4)     |                       |                      |                       |
|                      | LPE (22:6)     |                       |                      |                       |
| <b>Only clinical</b> | cPRA           | 0.36                  | 15.9%                | 0.80                  |
|                      | DSA            | (0.16 – 0.57)         | (7.4 – 29.2)         | (0.66 -0.90)          |
| <b>Merged models</b> | PC (18:0/20:4) | 0.81<br>(0.49 – 0.96) | 2.3%<br>(0.1 – 12.1) | 0.97<br>(0.88 – 1.00) |
|                      | LPE (16:0)     |                       |                      |                       |
|                      | LPE (20:4)     |                       |                      |                       |
|                      | LPE (22:6)     |                       |                      |                       |
|                      | DSA            |                       |                      |                       |

453

454



455 **References:**

- 456 1. Zhao Y-Y, Vaziri ND, Lin R-C. Chapter Six - Lipidomics: New Insight Into Kidney  
457 Disease. In: Makowski GS, editor. *Advances in Clinical Chemistry* [Internet]. Elsevier;  
458 2015 [cited 2018 Jul 23]. p. 153–75. Available from:  
459 <http://www.sciencedirect.com/science/article/pii/S0065242314000110>
- 460 2. Han X, Gross RW. Global analyses of cellular lipidomes directly from crude extracts of  
461 biological samples by ESI mass spectrometry a bridge to lipidomics. *J Lipid Res.* 2003 Jun  
462 1;44(6):1071–9.
- 463 3. Braun F, Rinschen MM, Bartels V, Frommolt P, Habermann B, Hoeijmakers JHJ, et al.  
464 Altered lipid metabolism in the aging kidney identified by three layered omic analysis.  
465 *Aging.* 2016 Feb 16;8(3):441–54.
- 466 4. Wilkins JM, Trushina E. Application of Metabolomics in Alzheimer’s Disease. *Front*  
467 *Neurol* [Internet]. 2018 Jan 12 [cited 2018 Jul 23];8. Available from:  
468 <https://www.ncbi.nlm.nih.gov/pmc/articles/PMC5770363/>
- 469 5. Kiezel-Tsugunova M, Kendall AC, Nicolaou A. Fatty acids and related lipid mediators in  
470 the regulation of cutaneous inflammation. *Biochem Soc Trans.* 2018 Feb 19;46(1):119–29.
- 471 6. Yu Z, Chen H, Ai J, Zhu Y, Li Y, Borgia JA, et al. Global lipidomics identified plasma  
472 lipids as novel biomarkers for early detection of lung cancer. *Oncotarget.* 2017 Nov  
473 13;8(64):107899–906.
- 474 7. Chen D-Q, Chen H, Chen L, Vaziri ND, Wang M, Li X-R, et al. The link between  
475 phenotype and fatty acid metabolism in advanced chronic kidney disease. *Nephrol Dial*  
476 *Transplant.* 2017 Jul 1;32(7):1154–66.
- 477 8. Hart A, Smith JM, Skeans MA, Gustafson SK, Wilk AR, Robinson A, et al. OPTN/SRTR  
478 2016 Annual Data Report: Kidney. *Am J Transplant.* 18(S1):18–113.
- 479 9. Djamali A, Kaufman DB, Ellis TM, Zhong W, Matas A, Samaniego M. Diagnosis and  
480 Management of Antibody-Mediated Rejection: Current Status and Novel Approaches. *Am J*  
481 *Transplant.* 14(2):255–71.
- 482 10. Baker RJ, Mark PB, Patel RK, Stevens KK, Palmer N. Renal association clinical practice  
483 guideline in post-operative care in the kidney transplant recipient. *BMC Nephrol.* 2017 Jun  
484 2;18(1):174.
- 485 11. Lachmann N, Terasaki PI, Budde K, Liefeldt L, Kahl A, Reinke P, et al. Anti-human  
486 leukocyte antigen and donor-specific antibodies detected by luminex posttransplant serve as  
487 biomarkers for chronic rejection of renal allografts. *Transplantation.* 2009 May  
488 27;87(10):1505–13.
- 489 12. Kumar D, Fattah H, Kimball PM, LeCorchick S, McDougan FA, King AL, et al. Post-  
490 transplant Desensitization for Deceased Donor Kidney Transplant Recipients: A Single  
491 Center Experience. *Clin Transpl.* 2016;32:143–51.

- 492 13. Haas M, Sis B, Racusen LC, Solez K, Glotz D, Colvin RB, et al. Banff 2013 Meeting  
493 Report: Inclusion of C4d-Negative Antibody-Mediated Rejection and Antibody-Associated  
494 Arterial Lesions. *Am J Transplant.* 14(2):272–83.
- 495 14. Gupta G, Regmi A, Kumar D, Posner S, Posner MP, Sharma A, et al. Safe Conversion  
496 From Tacrolimus to Belatacept in High Immunologic Risk Kidney Transplant Recipients  
497 With Allograft Dysfunction. *Am J Transplant.* 15(10):2726–31.
- 498 15. Contaifer D, Carl DE, Warncke UO, Martin EJ, Mohammed BM, Tassell BV, et al.  
499 Unsupervised analysis of combined lipid and coagulation data reveals coagulopathy  
500 subtypes among dialysis patients. *J Lipid Res.* 2017 Mar 1;58(3):586–99.
- 501 16. Zhao Y-Y, Wang H-L, Cheng X-L, Wei F, Bai X, Lin R-C, et al. Metabolomics analysis  
502 reveals the association between lipid abnormalities and oxidative stress, inflammation,  
503 fibrosis, and Nrf2 dysfunction in aristolochic acid-induced nephropathy. *Sci Rep.* 2015 Aug  
504 7;5:12936.
- 505 17. Kobayashi T, Matsumura Y, Ozawa T, Yanai H, Iwasawa A, Kamachi T, et al. Exploration  
506 of novel predictive markers in rat plasma of the early stages of chronic renal failure. *Anal*  
507 *Bioanal Chem.* 2014 Feb 1;406(5):1365–76.
- 508 18. Reis A, Rudnitskaya A, Chariyavilaskul P, Dhaun N, Melville V, Goddard J, et al. Top-  
509 down lipidomics of low density lipoprotein reveal altered lipid profiles in advanced chronic  
510 kidney disease. *J Lipid Res.* 2015 Feb;56(2):413–22.
- 511 19. Afshinnia F, Rajendiran TM, Karnovsky A, Soni T, Wang X, Xie D, et al. Lipidomic  
512 Signature of Progression of Chronic Kidney Disease in the Chronic Renal Insufficiency  
513 Cohort. *Kidney Int Rep.* 2016 Nov 1;1(4):256–68.
- 514 20. Hu J, Liu Z, Zhang H. Omega-3 fatty acid supplementation as an adjunctive therapy in the  
515 treatment of chronic kidney disease: a meta-analysis. *Clinics.* 2017 Jan;72(1):58–64.
- 516 21. Han E, Yun Y, Kim G, Lee Y, Wang HJ, Lee B-W, et al. Effects of Omega-3 Fatty Acid  
517 Supplementation on Diabetic Nephropathy Progression in Patients with Diabetes and  
518 Hypertriglyceridemia. Schunck W-H, editor. *PLOS ONE.* 2016 May 2;11(5):e0154683.
- 519 22. Matsumoto T, Kamata TK and K. Role of Lysophosphatidylcholine (LPC) in  
520 Atherosclerosis [Internet]. *Current Medicinal Chemistry.* 2007 [cited 2018 Jul 29].  
521 Available from: <http://www.eurekaselect.com/66005/article>
- 522 23. Schober C, Schiller J, Pinker F, Hengstler JG, Fuchs B. Lysophosphatidylethanolamine is –  
523 in contrast to – choline – generated under in vivo conditions exclusively by phospholipase  
524 A2 but not by hypochlorous acid. *Bioorganic Chem.* 2009 Dec 1;37(6):202–10.
- 525 24. Silva IT, Mello AP, Damasceno NR. Antioxidant and inflammatory aspects of lipoprotein-  
526 associated phospholipase A2 (Lp-PLA2 ): a review. *Lipids Health Dis.* 2011 Sep  
527 28;10:170.

- 528 25. Fuchs B, Schiller J, Wagner U, Häntzschel H, Arnold K. The  
529 phosphatidylcholine/lysophosphatidylcholine ratio in human plasma is an indicator of the  
530 severity of rheumatoid arthritis: Investigations by <sup>31</sup>P NMR and MALDI-TOF MS. *Clin*  
531 *Biochem.* 2005 Oct 1;38(10):925–33.
- 532 26. Mulder C, Wahlund L-O, Teerlink T, Blomberg M, Veerhuis R, van Kamp GJ, et al.  
533 Decreased lysophosphatidylcholine/phosphatidylcholine ratio in cerebrospinal fluid in  
534 Alzheimer's disease. *J Neural Transm.* 2003 Aug 1;110(8):949–55.
- 535 27. Nishina A, Kimura H, Sekiguchi A, Fukumoto R, Nakajima S, Furukawa S.  
536 Lysophosphatidylethanolamine in *Grifola frondosa* as a neurotrophic activator via  
537 activation of MAPK. *J Lipid Res.* 2006 Jul 1;47(7):1434–43.
- 538 28. Lee J-M, Park S-J, Im D-S. Lysophosphatidylethanolamine increases intracellular Ca<sup>2+</sup>  
539 through LPA1 in PC-12 neuronal cells. *Biochem Biophys Res Commun.* 2015 May  
540 29;461(2):378–82.
- 541 29. Hung ND, Kim MR, Sok D-E. 2-Polyunsaturated Acyl Lysophosphatidylethanolamine  
542 Attenuates Inflammatory Response in Zymosan A-Induced Peritonitis in Mice. *Lipids.* 2011  
543 Oct 1;46(10):893.
- 544 30. Syren M-L, Turolo S, Marangoni F, Milani GP, Edefonti A, Montini G, et al. The  
545 polyunsaturated fatty acid balance in kidney health and disease: A review. *Clin Nutr*  
546 [Internet]. 2017 Dec 6 [cited 2018 Jul 31]; Available from:  
547 <http://www.sciencedirect.com/science/article/pii/S0261561417314176>
- 548 31. Malhotra R, Cavanaugh KL, Blot WJ, Ikizler TA, Lipworth L, Kabagambe EK. Dietary  
549 polyunsaturated fatty acids and incidence of end-stage renal disease in the Southern  
550 Community Cohort Study. *BMC Nephrol* [Internet]. 2016 Oct 18 [cited 2018 Jul 31];17.  
551 Available from: <https://www.ncbi.nlm.nih.gov/pmc/articles/PMC5070154/>
- 552 32. Eide IA, Jenssen T, Hartmann A, Diep LM, Dahle DO, Reisæter AV, et al. The Association  
553 between Marine n-3 Polyunsaturated Fatty Acid Levels and Survival after Renal  
554 Transplantation. *Clin J Am Soc Nephrol.* 2015 Jul 7;10(7):1246–56.
- 555 33. Dunn T, Noreen H, Gillingham K, Maurer D, Ozturk OG, Pruett T, et al. Revisiting  
556 Traditional Risk Factors for Rejection and Graft Loss after Kidney Transplantation. *Am J*  
557 *Transplant Off J Am Soc Transplant Am Soc Transpl Surg.* 2011 Oct;11(10):2132–43.
- 558 34. Mikolasevic I, Žutelija M, Mavrinac V, Orlic L. Dyslipidemia in patients with chronic  
559 kidney disease: etiology and management. *Int J Nephrol Renov Dis.* 2017 Feb 7;10:35–45.

560  
561  
562  
563

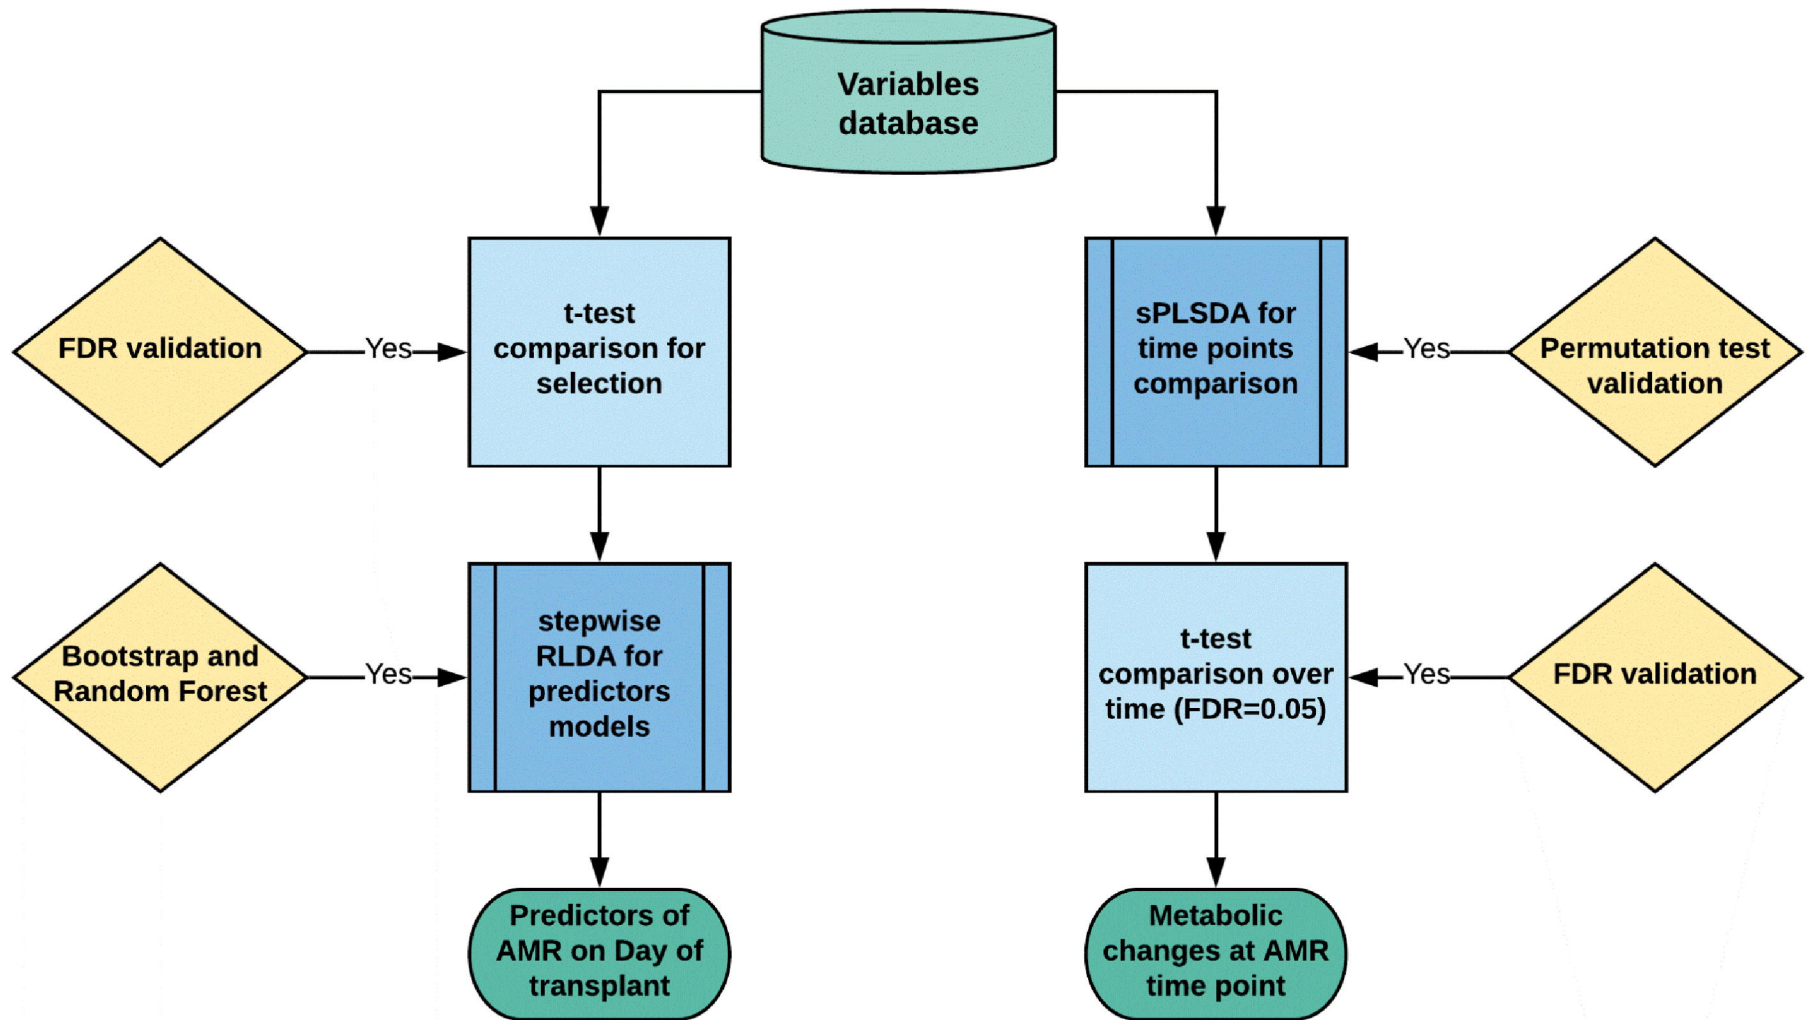

**A**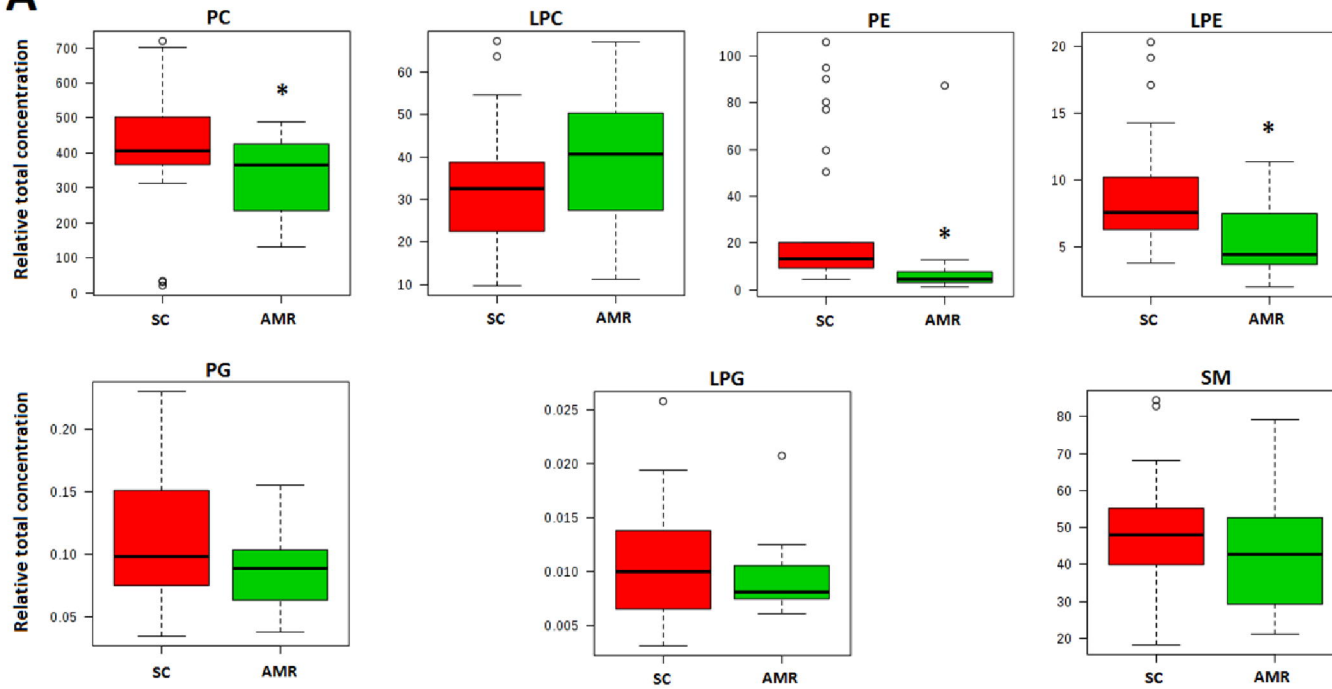**B**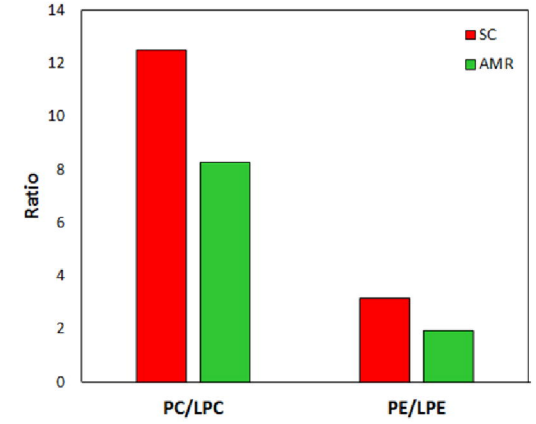

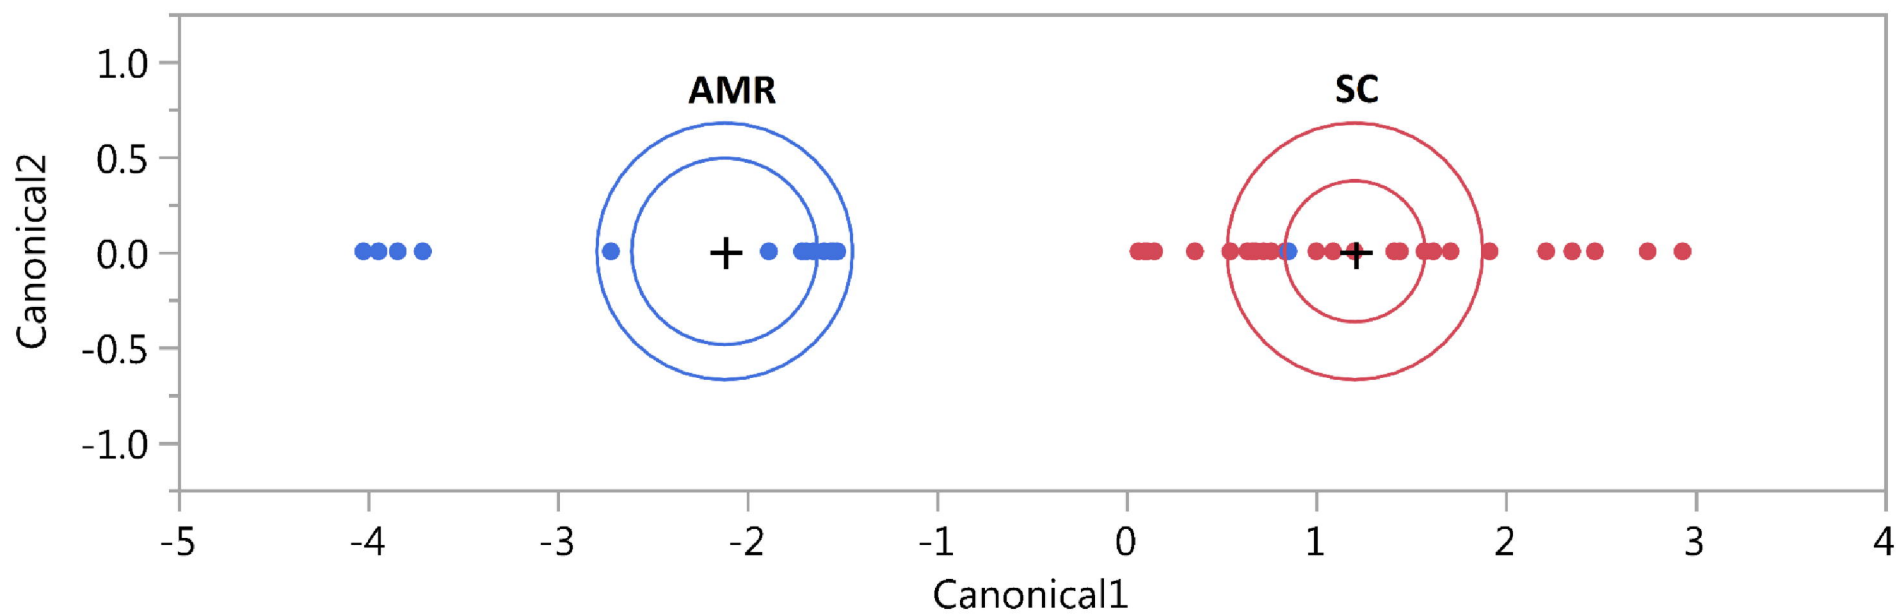

**A**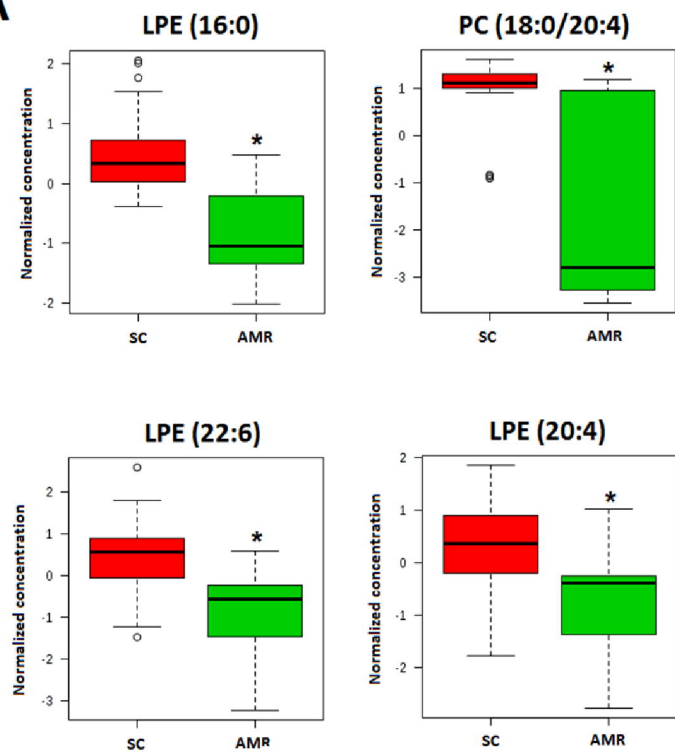

AMR Predictors

**B**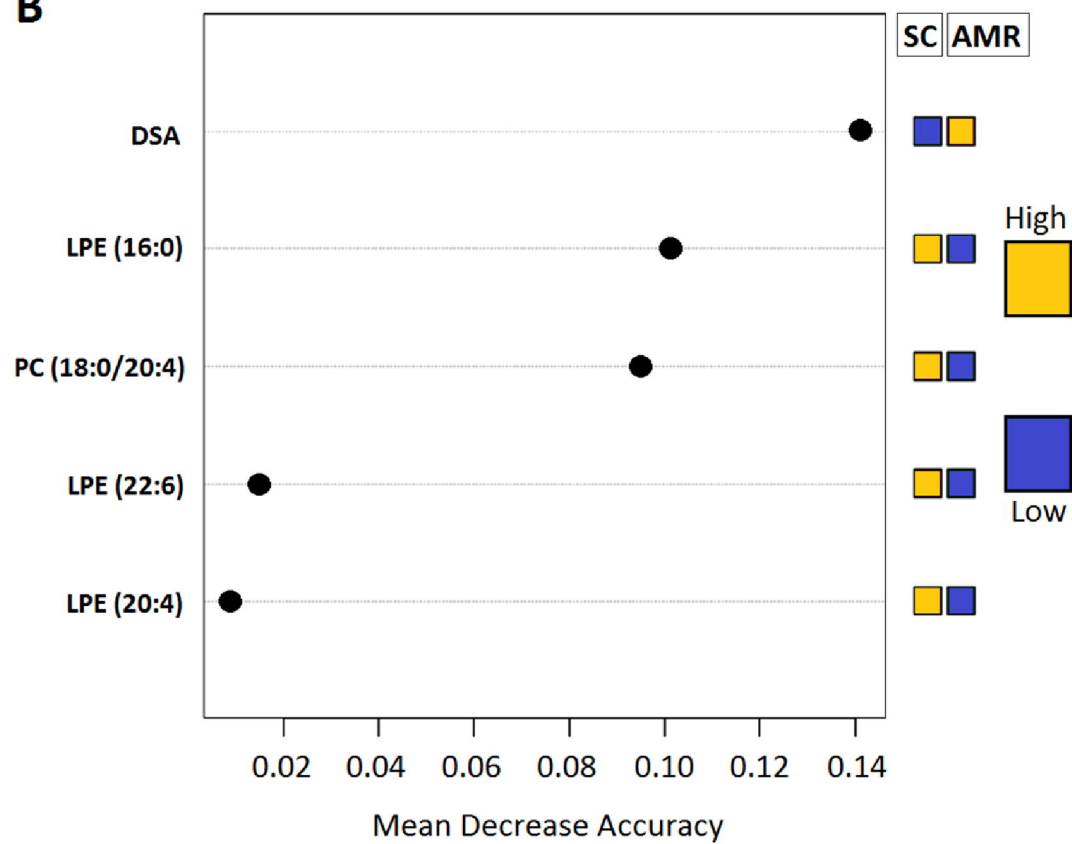

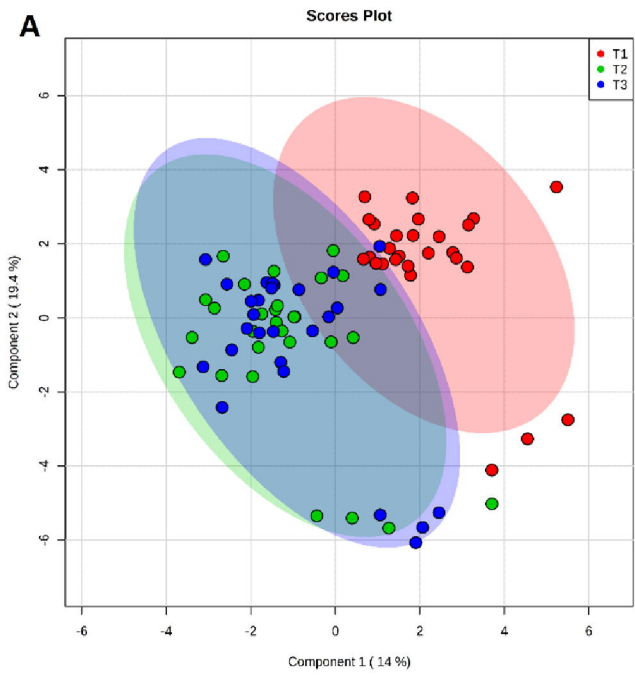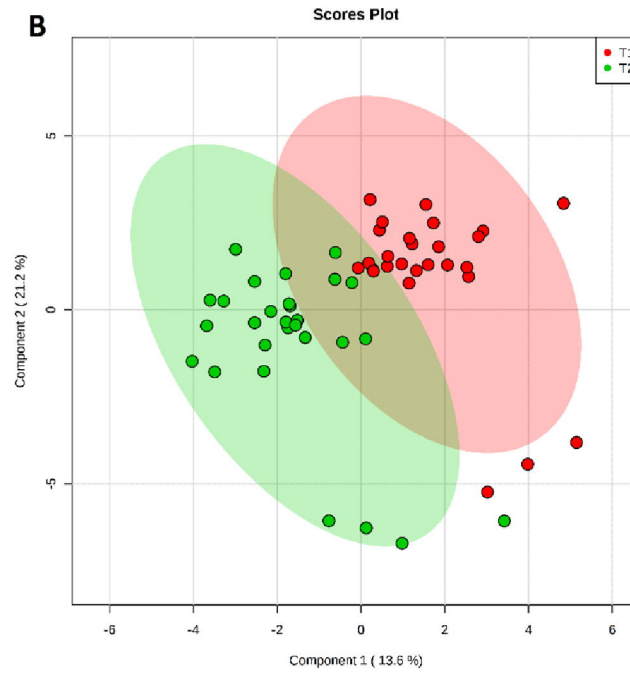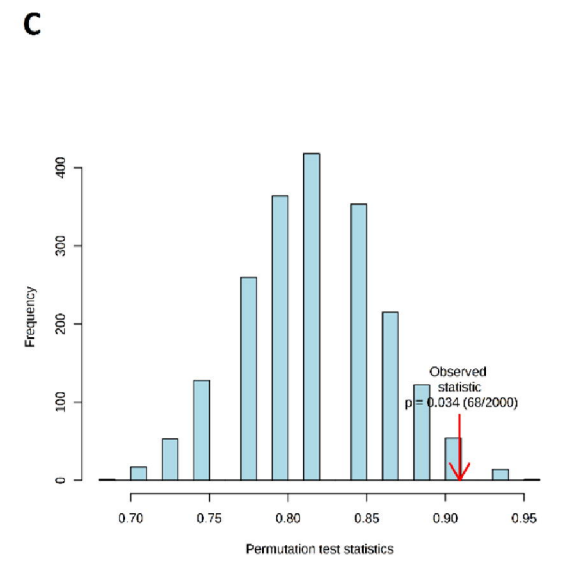



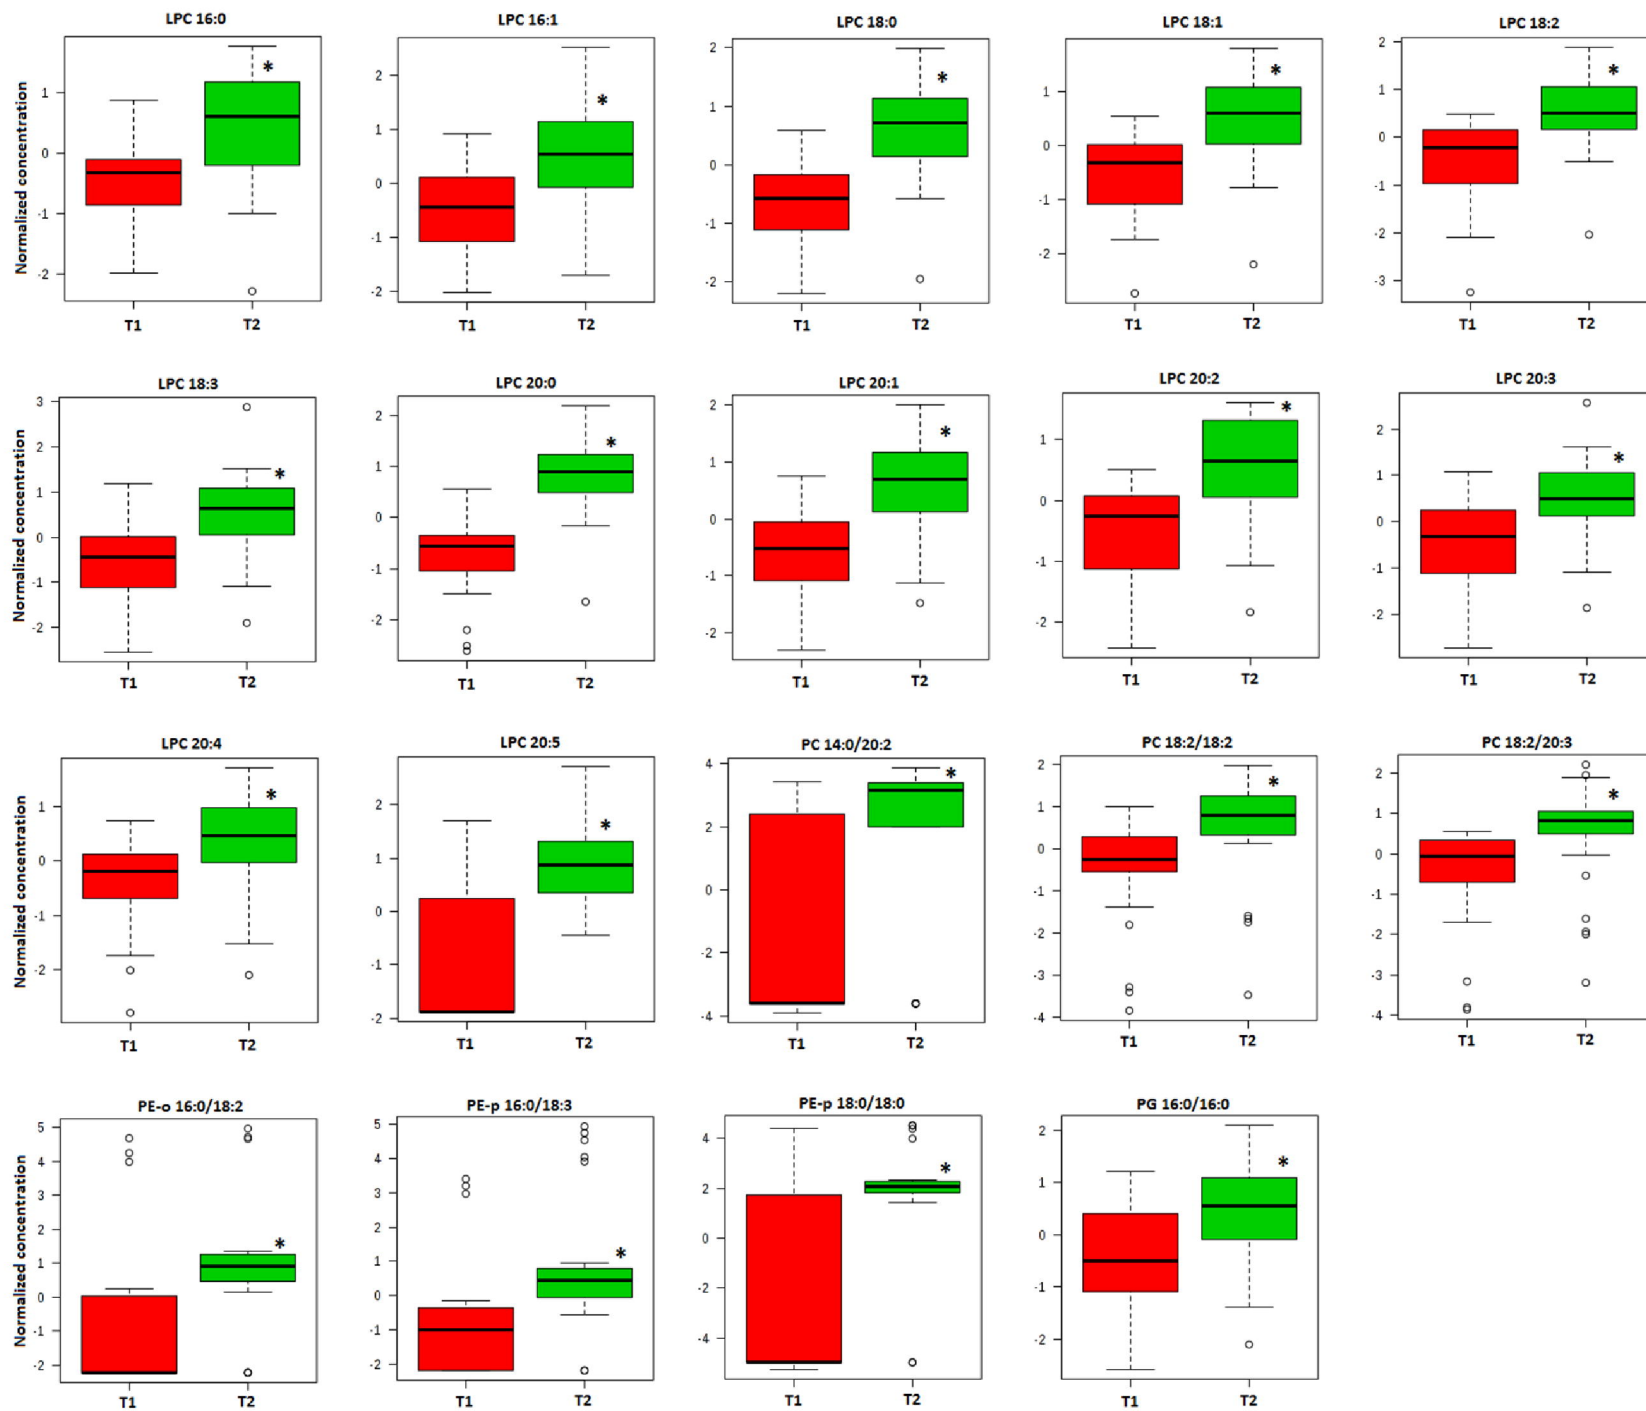

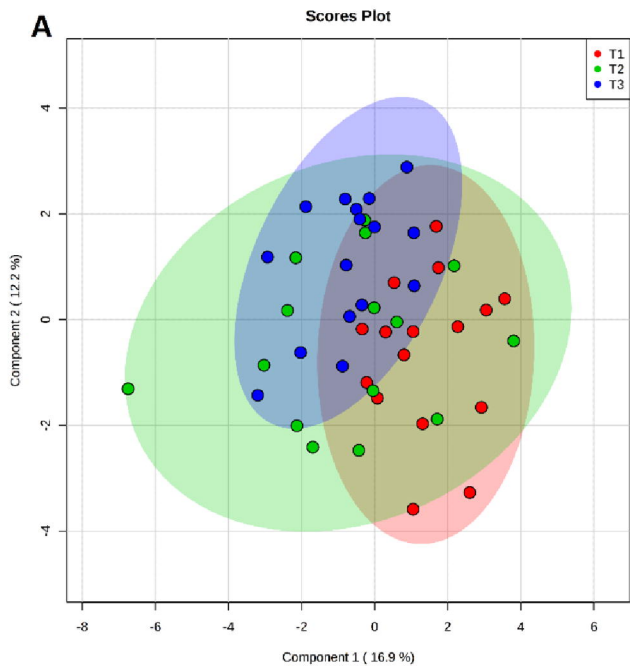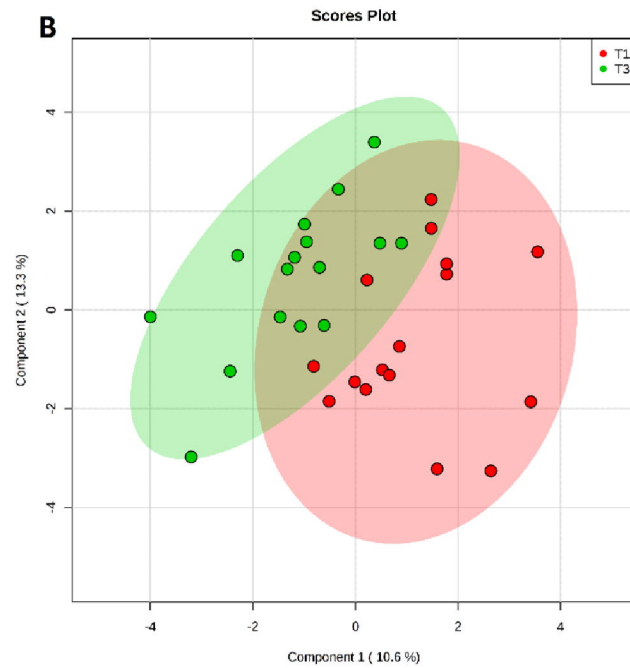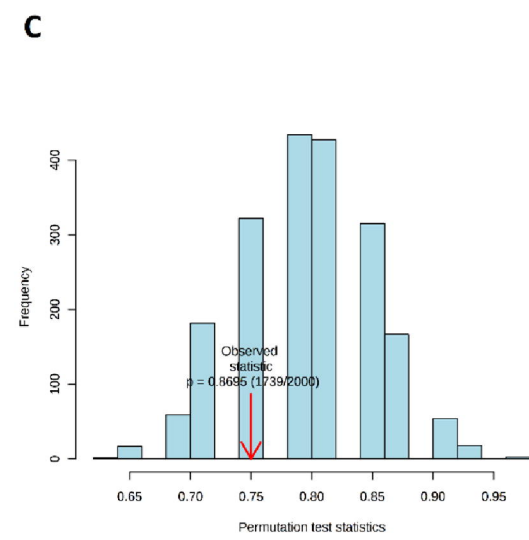

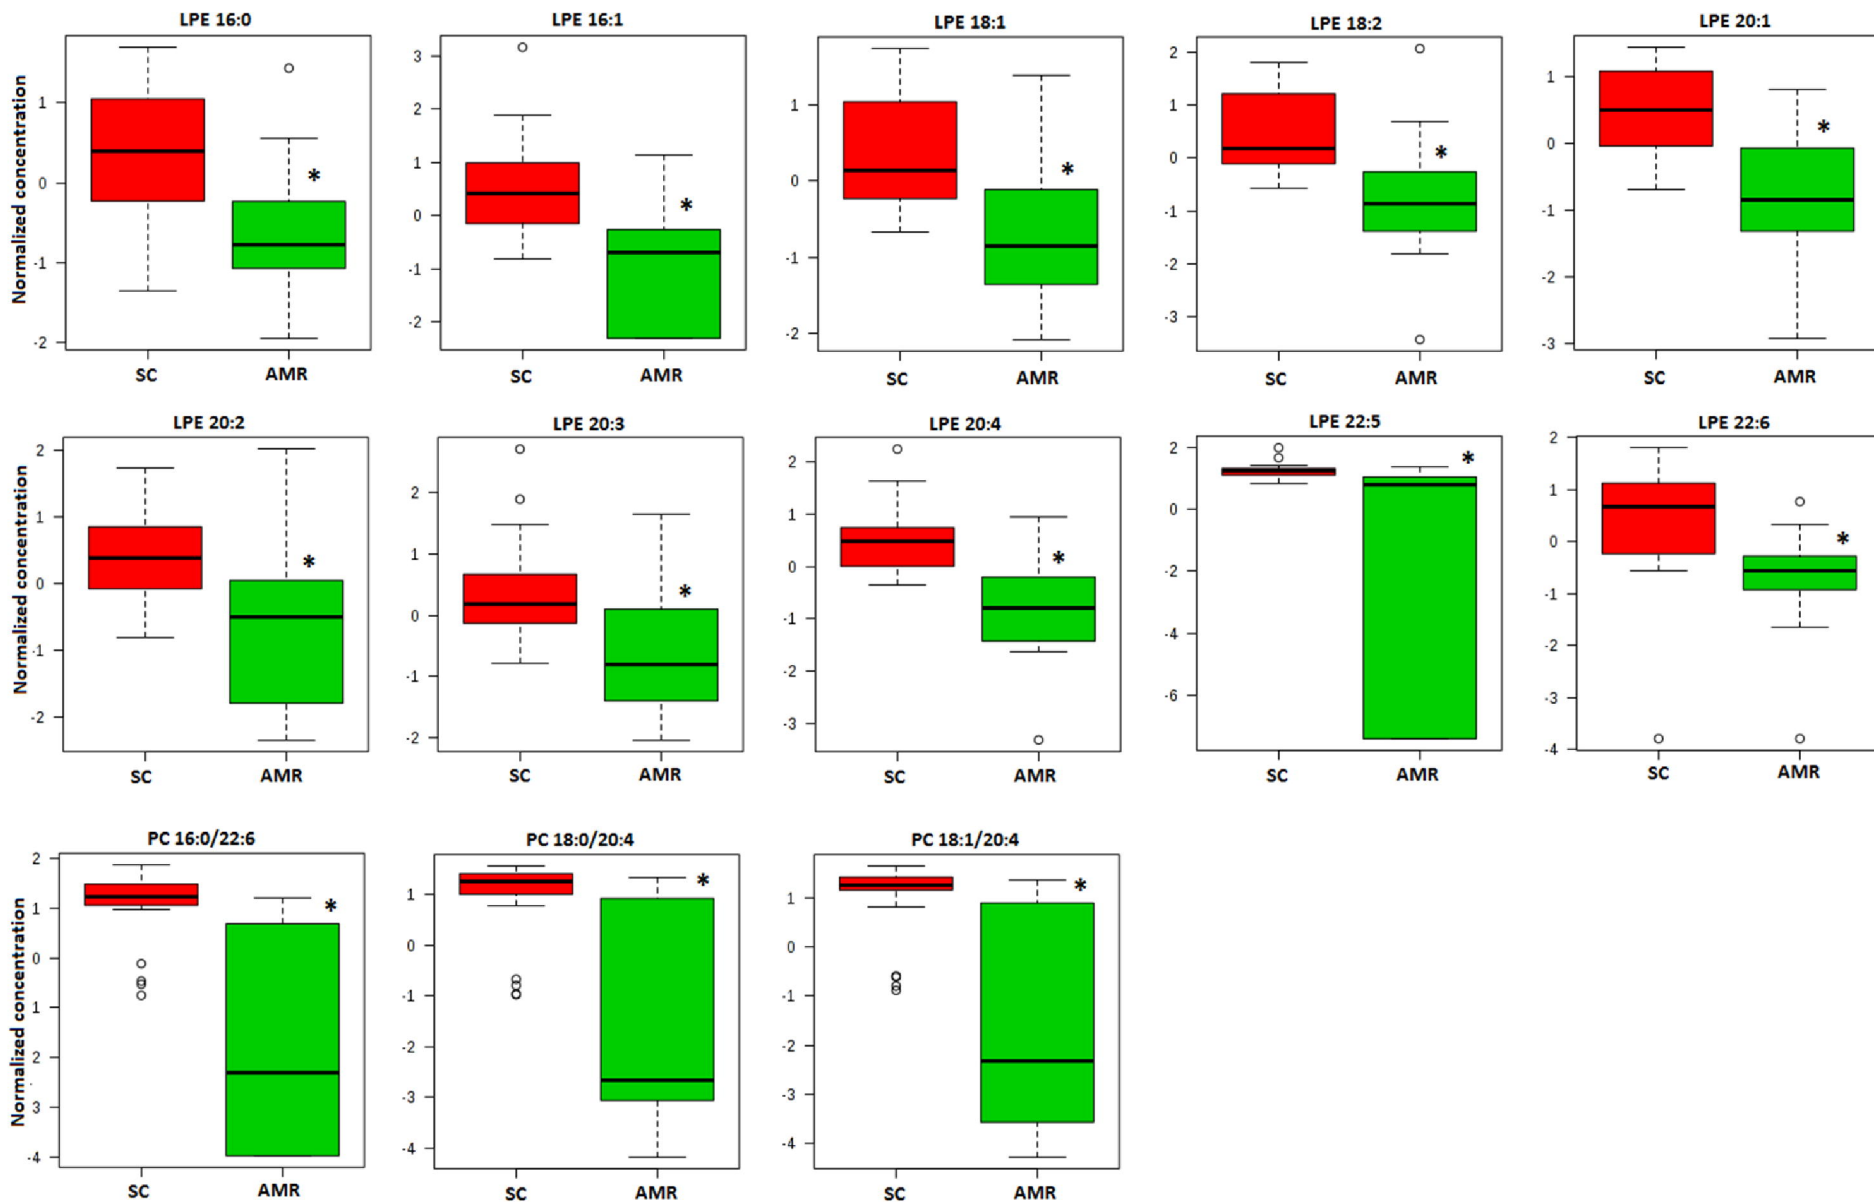

Source: http://biorxiv.org/content/10.1101/460030v1.full.pdf
